# Supplementary material for: Expression levels of specific microRNAs are increased after exercise and are associated with cognitive improvement in Parkinson's disease
Source: PubMed Central journal article supplement — Mol Med Rep. 2021 Jun 29;24(2):618. doi: 10.3892/mmr.2021.12257 (PMC8258464; doi:10.3892/mmr.2021.12257), 2021-06-29
Supplement: Supplementary_Data2.pdf [file Supplementary_Data2.pdf]

Figure S1. Venn diagram of target genes predicted in TargetScan and miRDB. Among these genes, 943 were predicted for miR-106a-5p, 438 for miR-103a-3p and 771 for miR-29a-3p in both databases.

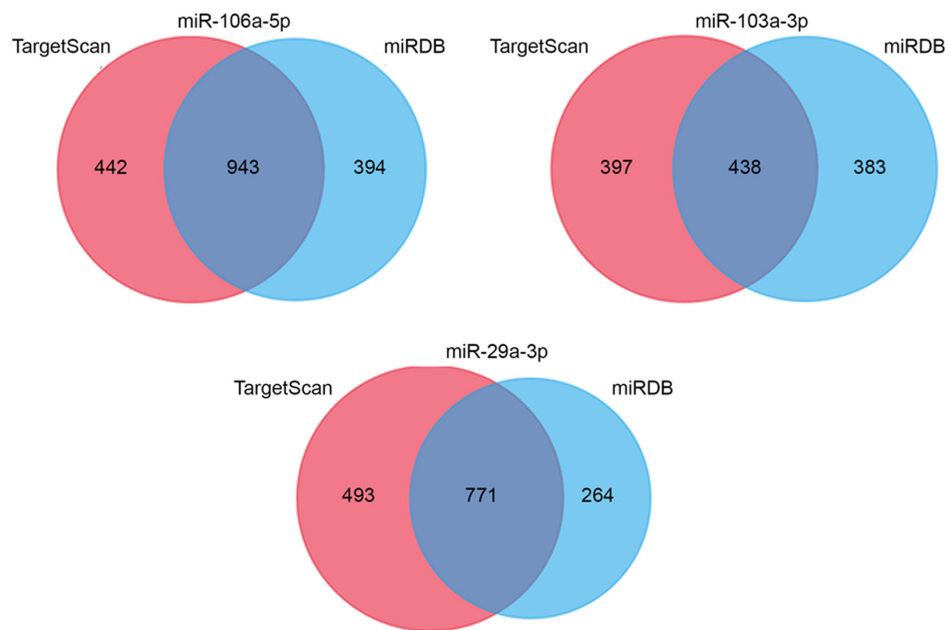

Table SI. Sequence of the forward primers for reverse transcription-quantitative PCR. The kit provides universal reverse primers.

| Primer name     | Sequence 5'→3'          |
|-----------------|-------------------------|
| cel-miR-238-3p  | TTTGTACTCCGATGCCATTCAGA |
| hsa-miR-106a-5p | AAAAGTGCTTACAGTGCAGGTAG |
| hsa-miR-103a-3p | CAGCATTGTACAGGGCTATGA   |
| hsa-miR-29a-3p  | GTAGCACCATCTGAAATCGGTTA |

miR, microRNA.
